# Supplementary material
Source: publisher site journal article supplement (https://www.dovepress.com/article/405498)
Supplement: Supplementary file 1 [file get_supplementary_file.php]

**Comparative effectiveness of umeclidinium/vilanterol versus inhaled corticosteroid/long-acting β2-agonist in patients with chronic obstructive pulmonary disease in a primary care setting in England**

**Authors:** Alexandrosz Czira1, Gema Requena1, Victoria Banks2*, Robert Wood2, Theo Tritton2, Catherine M Castillo2, Jie Yeap2*, Rosie Wild2, Chris Compton1, Kieran J Rothnie1, Felix Herth3,4, Jennifer K Quint5, Afisi S. Ismaila6,7

**Affiliations:** 1R&D Global Medical, GSK, Brentford, Middlesex, UK; 2Real-world Evidence,Adelphi Real World, Bollington, Cheshire, UK; 3Department of Pulmonology and Respiratory Care Medicine, Thoraxklinik at the University of Heidelberg, Heidelberg, Germany; 4Translational Lung Research Center Heidelberg, Member of the German Center for Lung Research DZL, Heidelberg, Germany; 5National Heart and Lung Institute, Imperial College London, London, UK; 6Value Evidence and Outcomes, GSK, Collegeville, PA, USA; 7Department of Health Research Methods, Evidence and Impact, McMaster University, Hamilton, ON, Canada

*At the time of the study

**Supplementary material**

**Supplementary Figure 1**. Sample attrition


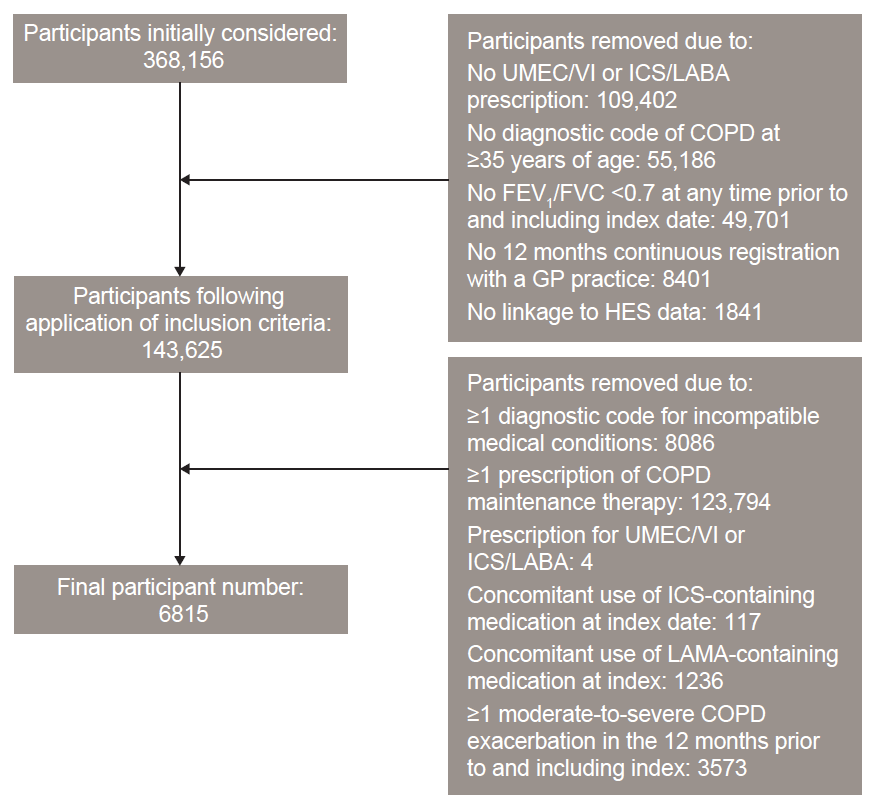


COPD, chronic obstructive pulmonary disease; FEV1, forced expiratory volume in 1 second; FVC, forced vital capacity; GP, general practitioner; HES, Health Episode Statistics; ICS, inhaled corticosteroid; LABA, long-acting β2-agonist; LAMA, long-acting muscarinic antagonist; UMEC, umeclidinium; VI, vilanterol.

**Supplementary Figure 2.** Kaplan–Meier plots of time-to-first triple therapy for A) unweighted and B) weighted analyses


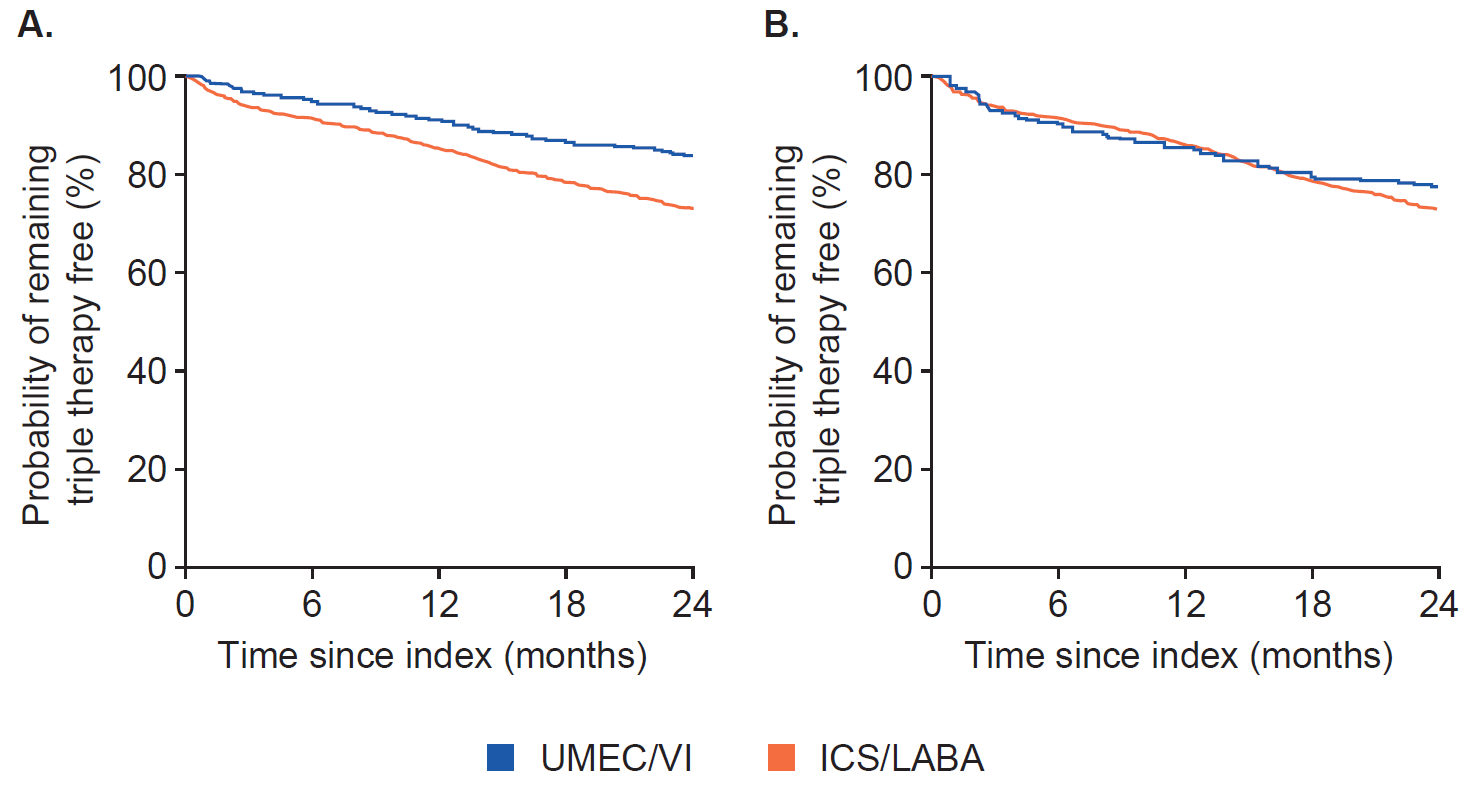


ICS, inhaled corticosteroid; LABA, long-acting β2-agonist; UMEC, umeclidinium; VI, vilanterol.

**Supplementary Figure 3.** Kaplan–Meier plots of time-to-first moderate-to-severe COPD exacerbation for A) unweighted and B) weighted analyses


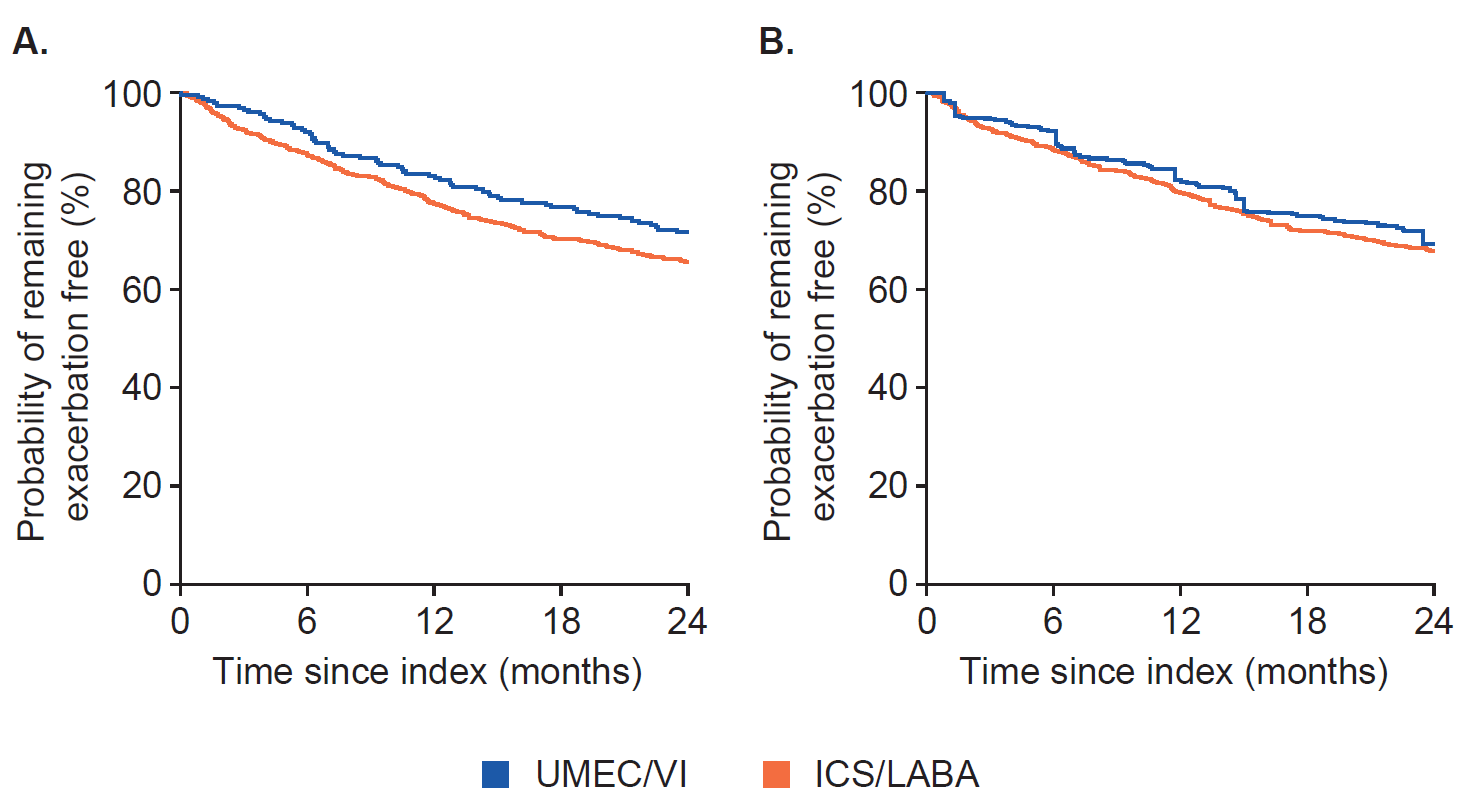


COPD, chronic obstructive pulmonary disease. ICS, inhaled corticosteroid; LABA, long-acting β2-agonist; UMEC, umeclidinium; VI, vilanterol.

**Supplementary Table 1.** PS model balance: Number (%) covariates with insufficient balance for models for each outcome

|  | **Unweighted (number [%] of imbalanced covariates)** | | **Weighted  (number [%] of imbalanced covariates)** | |
| --- | --- | --- | --- | --- |
| **Adherencea** | | | | |
| 6 months | 28/43 (65.1) | | 9/43 (20.9) | |
| 12 months | 25/43 (58.1) | | 10/43 (23.3) | |
| 18 months | 27/43 (62.8) | | 11/43 (25.6) | |
| 24 months | 17/39 (43.6) | | 6/39 (15.4) | |
| **Time-to-first triple therapy** | 25/46 (54.3) | | 14/46 (30.4) | |
| **Time-to-first on-treatment COPD exacerbation** | | | | |
| Moderate-to-severe | 38/60 (63.3) | | 19/60 (31.7) | |
| Moderate | 24/47 (51.1) | | 12/47 (25.5) | |
| Severe | 21/48 (43.8) | | 4/48 (8.3) | |
| **HCRU at 12 months** | **COPD-related** | **All-cause** | **COPD-related** | **All-cause** |
| Number of prescriptions | 26/51 (51.0) | 36/58 (62.1) | 16/51 (31.4) | 18/58 (31.0) |
| Number of consultations | 37/55 (67.3) | 26/60 (43.3) | 17/55 (30.9) | 19/60 (31.2) |
| Number of inpatient stays | 23/47 (48.9) | 13/41 (31.7) | 5/47 (10.6) | 1/41 (2.4) |
| Number of A&E visits | 29/47 (61.7) | 29/51 (56.9) | 3/47 (6.4) | 23/51 (45.1) |
| **Medical costs at 12 months** | **COPD-related** | **All-cause** | **COPD-related** | **All-cause** |
| Number of prescriptions | 33/51 (64.7) | 37/60 (61.7) | 16/51 (31.4) | 18/60 (30.0) |
| Number of GP consultations | 36/54 (66.7) | 36/52 (69.2) | 17/54 (31.5) | 16/52 (30.8) |
| Number of inpatients stays | 12/36 (33.3) | 25/44 (56.8) | 1/36 (2.8) | 2/44 (4.5) |
| Number of A&E visits | 17/45 (37.8) | 28/49 (57.1) | 1/45 (2.2) | 18/49 (36.7) |
| **Total medical costs** | **COPD-related** | **All-cause** | **COPD-related** | **All-cause** |
| 6 months | 21/42 (50.0) | 23/45 (51.1) | 5/42 (11.9) | 4/45 (8.9) |
| 12 months | 21/42 (50.0) | 23/46 (50.0) | 5/42 (11.9) | 6/46 (13.0) |
| 18 months | 21/43 (48.8) | 24/48 (50.0) | 5/43 (11.6) | 5/48 (10.4) |
| 24 months | 21/42 (50.0) | 24/48 (50.0) | 5/42 (11.9) | 5/48 (10.4) |

aCovariates varied between timepoints. A&E, Accident and Emergency; COPD, chronic obstructive pulmonary disease; GP, general practitioner; HCRU, healthcare resource utilization; PS, propensity score.

**Supplementary Table 2.** Sensitivity analyses for all outcomes

|  | **Unweighted** | | **Weighted** | |
| --- | --- | --- | --- | --- |
|  | **Average treatment effect (95% CI)** | **p-value** | **Average treatment effect (95% CI)** | **p-value** |
|  |  |  |  |  |
| **Adherence** |  |  |  |  |
| **Stockpiling (ordering early prescriptions for later use)** | | | | |
| 6 months | 1.49 (1.09, 2.04) | 0.0131 | 1.52 (0.99, 2.36) | 0.0581 |
| 12 months | 1.59 (1.13, 2.24) | 0.0080 | 1.71 (1.08, 2.69) | 0.0210 |
| 18 months | 1.61 (1.09, 2.38) | 0.0167 | 1.75 (1.13, 2.72) | 0.0119 |
| 24 months | 1.50 (1.23, 1.82) | 0.0001 | 1.47 (1.16, 1.87) | 0.0017 |
| **PDC≥50%** | | | | |
| 6 months | 1.41 (1.02, 1.94) | 0.0373 | 1.46 (0.94, 2.27) | 0.0952 |
| 12 months | 1.75 (1.23, 12.48) | 0.0016 | 1.78 (1.12, 2.82) | 0.0145 |
| 18 months | 1.75 (1.18, 2.59) | 0.0052 | 1.84 (1.17, 2.91) | 0.0089 |
| 24 months | Model convergence not achieved | | | |
| **Sensitivity analyses for adherence at 12 monthsa** | | | | |
| PDC≥80% where subgroup histograms are trimmed where they do not overlap | 1.87 (1.34, 2.60) | 0.0002 | 1.95 (0.82, 4.64) | 0.1294 |
| PDC ≥80% where current asthma patients are excluded | 1.93 (1.38, 2.69) | 0.0001 | 2.12 (1.33, 3.41) | 0.0017 |
| PDC ≥80% where ethnicity covariate was removed from IPTW | 1.94 (1.68, 2.24) | <0.0001 | 1.74 (1.40, 2.17) | <0.0001 |
| PDC ≥80% where ethnicity covariate was removed from IPTW and current asthma patients excluded | 1.83 (1.57, 2.13) | <0.0001 | 1.54 (1.23, 1.93) | 0.0002 |
| Imbalanced covariates added back into final weighted model | 2.17 (1.59, 2.95) | <0.0001 | 2.37 (1.45, 3.87) | 0.0005 |
| **Time-to-first triple therapy** | 0.43 (0.25, 0.75) | 0.0028 | 0.90 (0.47, 1.73) | 0.7481 |
| **Time-to-first on-treatment COPD exacerbation** | | | | |
| Moderate-to-severe | 0.89 (0.76, 1.05) | 0.1639 | 0.91 (0.73, 1.13 | 0.3921 |
| Moderate | 0.88 (0.74, 1.05) | 0.1461 | 0.86 (0.67, 1.11) | 0.2434 |
| Severe | 1.04 (0.78, 1.39) | 0.8005 | 1.15 (0.80, 1.66) | 0.4462 |
| **COPD-related HCRU at 12 months** | | | | |
| Number of prescriptions | 0.85 (0.83, 0.88) | <0.0001 | 0.90 (0.86, 0.93) | <0.0001 |
| Number of GP visits | 0.55 (0.45, 0.68) | 0 | 0.67 (0.50, 0.89) | 0.0054 |
| Number of inpatients stays | 0.97 (0.37, 2.56) | 0.9567 | 0.72 (0.29, 1.77) | 0.4741 |
| Number of A&E visits | 1.12 (0.24, 5.25) | 0.8840 | 1.17 (0.25, 5.45) | 0.8400 |
| **All-cause HCRU at 12 months** | | | | |
| Number of prescriptions | 0.84 (0.68, 1.05) | 0.1235 | 0.86 (0.69, 1.05) | 0.1412 |
| Number of GP visits | 0.73 (0.61, 0.88) | 0.0007 | 0.74 (0.60, 0.91) | 0.0051 |
| Number of inpatients stays | 0.88 (0.53, 1.45) | 0.6149 | 0.74 (0.36, 1.53) | 0.4188 |
| Number of A&E visits | 0.70 (0.42, 1.15) | 0.1597 | 0.59 (0.35, 0.99) | 0.0472 |
| **COPD-related medical costs at 12 monthsb** | | | | |
| Prescriptions | 0.91 (0.78, 1.07) | 0.2394 | 1.01 (0.90, 1.15) | 0.8214 |
| GP visits | 0.50 (0.39, 0.63) | 0 | 0.72 (0.50, 1.05) | 0.0867 |
| Inpatients stays | 1.03 (0.33, 3.15) | 0.9649 | 0.63 (0.21, 1.89) | 0.4115 |
| A&E visits | 1.17 (0.28, 4.92) | 0.8263 | 1.18 (0.27, 5.15) | 0.8268 |
| **All-cause medical costs at 12 monthsb** | | | | |
| Prescriptions | 0.88 (0.75, 1.05) | 0.1523 | 0.93 (0.77, 1.13) | 0.4809 |
| GP visits | 0.71 (0.60, 0.85) | 0.0002 | 0.82 (0.62, 1.09) | 0.1774 |
| Inpatients stays | 1.37 (0.85, 2.21) | 0.1935 | 1.26 (0.77, 2.06) | 0.3610 |
| A&E visits | 0.62 (0.35, 1.10) | 0.1043 | 0.47 (0.25, 0.89) | 0.0213 |
| **COPD-related total medical costs** | | | | |
| 6 months | 0.89 (0.50, 1.57) | 0.6782 | 0.78 (0.47, 1.30) | 0.3444 |
| 12 months | 0.94 (0.54, 1.62) | 0.8192 | 0.77 (0.50, 1.17) | 0.2184 |
| 18 months | 1.10 (0.66, 1.82) | 0.7163 | 0.88 (0.59, 1.32) | 0.5345 |
| 24 months | 1.13 (0.69, 1.85) | 0.6168 | 0.93 (0.62, 1.38) | 0.7042 |
| **All-cause total medical costs** | | | | |
| 6 months | 1.18 (0.85, 1.65) | 0.3287 | 1.19 (0.84, 1.69) | 0.3238 |
| 12 months | 1.09 (0.79, 1.50) | 0.5972 | 0.97 (0.71, 1.33) | 0.8622 |
| 18 months | 1.23 (0.91, 1.66) | 0.1770 | 1.08 (0.80, 1.46) | 0.6233 |
| 24 months | 1.26 (0.95, 1.69) | 0.1106 | 1.14 (0.85, 1.53) | 0.3813 |

aPost hoc analyses; bPer patient per year. A&E, Accident and Emergency; COPD, chronic obstructive pulmonary disease; CI, confidence interval; GP, general practitioner; HCRU, healthcare resource utilization; IPTW, inverse probability of treatment weighting;PDC, proportion of days covered**.**

**Supplementary Table 3.** Proportion of patients adherent (PDC≥80%) at 6, 18, and 24 months post-index

| **Patients with  PCD ≥80% (%)** | **Unweighted** | | **Weighted** | |
| --- | --- | --- | --- | --- |
| **UMEC/VI** | **ICS/LABA** | **UMEC/VI** | **ICS/LABA** |
| 6 months | 62.2 | 51.0 | 64.3 | 52.4 |
| 18 months | 49.6 | 37.9 | 51.4 | 39.5 |
| 24 months | 41.1 | 33.3 | 41.1 | 33.8 |

ICS, inhaled corticosteroid; LABA, long-acting β2-agonist; PDC, proportion of days covered; UMEC, umeclidinium; VI, vilanterol.

**Supplementary Table 4**. Incidence of COPD-related and all-cause HCRU use at 12 months post-index

|  | **HCRU, mean per person per day** | | | |
| --- | --- | --- | --- | --- |
| **Unweighted** | | **Weighted** | |
| **UMEC/VI** | **ICS/LABA** | **UMEC/VI** | **ICS/LABA** |
| **COPD-related** | | | | |
| Prescriptions | 0.03 | 0.04 | 0.03 | 0.03 |
| GP visits | <0.01 | <0.01 | <0.01 | 0.01 |
| Inpatient stays | <0.01 | <0.01 | <0.01 | <0.01 |
| A&E visits | <0.01 | <0.01 | <0.01 | <0.01 |
| **All-cause** |  |  |  |  |
| Prescriptions | 0.22 | 0.21 | 0.21 | 0.20 |
| GP visits | 0.03 | 0.04 | 0.03 | 0.04 |
| Inpatient stays | <0.01 | <0.01 | <0.01 | <0.01 |
| A&E visits | <0.01 | <0.01 | <0.01 | <0.01 |

A&E, Accident and Emergency; COPD, chronic obstructive pulmonary disease; GP, general practitioner; HCRU, healthcare resource utilization; ICS, inhaled corticosteroid; LABA, long-acting β2-agonist; UMEC, umeclidinium; VI, vilanterol.

**Supplementary Table 5**. COPD-related and all-cause HCRU costs at 12 months post-index

|  | **Mean (SD) costs (GBP), per person per year** | | | |
| --- | --- | --- | --- | --- |
| **Unweighted** | | **Weighted** | |
| **UMEC/VI** | **ICS/LABA** | **UMEC/VI** | **ICS/LABA** |
| **COPD-related** | | | | |
| Prescriptions | 331 (164.7) | 280 (198.9) | 365 (171.0) | 269 (200.8) |
| GP visits | 58 (81.5) | 75 (90.4) | 75 (110.3) | 67 (81.5) |
| Inpatient stays | 478 (3299.9) | 379 (3146.8) | 421 (2970.7) | 422 (3387.8) |
| A&E visits | 10 (78.8) | 9 (58.9) | 13 (106.6) | 10 (62.4) |
| **All-cause** |  |  |  |  |
| Prescriptions | 643 (445.8) | 586 (523.7) | 631 (404.3) | 551 (475.0) |
| GP visits | 429 (471.4) | 479 (447.4) | 456 (468.7) | 476 (406.3) |
| Inpatient stays | 2136 (6136.5) | 1592 (5307.0) | 2525 (7489.7) | 1609 (5269.9) |
| A&E visits | 103 (246.0) | 102 (274.7) | 97 (224.8) | 94 (256.6) |

A&E, Accident and Emergency; COPD, chronic obstructive pulmonary disease; GBP, British Pound Sterling; GP, general practitioner; HCRU, healthcare resource utilization; ICS, inhaled corticosteroid; LABA, long-acting β2-agonist; SD, standard deviation; UMEC, umeclidinium; VI, vilanterol.

**Supplementary Table 6.** COPD-related and all-cause total HCRU costs

|  | **Mean (SD) costs, per person per year (GBP)** | | | |
| --- | --- | --- | --- | --- |
| **Unweighted** | | **Weighted** | |
| **UMEC/VI** | **ICS/LABA** | **UMEC/VI** | **ICS/LABA** |
| **Total COPD-related costs** | | | | |
| 6 months | 960 (3511.1) | 792 (4223.3) | 758 (2666.4) | 785 (4138.8) |
| 12 months | 1134 (3611.8) | 822 (4174.0) | 1037 (3046.2) | 808 (4089.2) |
| 18 months | 1243 (3754.2) | 889 (4245.7) | 1260 (3530.7) | 862 (4125.7) |
| 24 months | 1313 (3758.7) | 906 (4244.1) | 1368 (3566.0) | 882 (4140.9) |
| **Total all-cause costs** | | | | |
| 6 months | 3066 (6606.5) | 2551 (5925.8) | 3475 (7730.1) | 2539 (5828.1) |
| 12 months | 3307 (6517.4) | 2759 (5679.2) | 4013 (8296.1) | 2770 (5558.8) |
| 18 months | 3626 (6617.4) | 2888 (5685.7) | 4310 (8410.4) | 2878 (5515.3) |
| 24 months | 3718 (6543.3) | 2963 (5739.8) | 4525 (8380.8) | 2949 (5583.0) |

COPD, chronic obstructive pulmonary disease; GBP, British Pound Sterling; HCRU, healthcare resource utilization; ICS, inhaled corticosteroid; LABA, long-acting β2-agonist; SD, standard deviation; UMEC, umeclidinium; VI, vilanterol.

**Supplementary Table 7.** Rescue medication prescriptions 6, 12, 18, and 24 months post-index

|  | **Mean (SD) number of prescriptions per person** | |
| --- | --- | --- |
| **UMEC/VI** | **ICS/LABA** |
| 6 months | 1.9 (2.3) | 2.4 (2.7) |
| 12 months | 3.8 (4.5) | 5.0 (5.1) |
| 18 months | 5.6 (6.5) | 7.6 (7.4) |
| 24 months | 7.1 (8.1) | 10.3 (9.8) |

COPD, chronic obstructive pulmonary disease; ICS, inhaled corticosteroid; LABA, long-acting β2-agonist; SD, standard deviation; UMEC, umeclidinium; VI, vilanterol.

**Supplementary Table 8.** Proportion of patients with rescue medication prescriptions at 6, 12, 18, and 24 months post-index

|  | **UMEC/VI** | **ICS/LABA** |
| --- | --- | --- |
| **6 months** | **n=1450** | **n=4924** |
| 0 | 39.1 | 31.6 |
| 1–2 | 30.6 | 29.3 |
| 3–4 | 15.9 | 18.9 |
| 5–6 | 9.0 | 12.7 |
| 7+ | 5.4 | 7.5 |
| **12 months** | **n=1172** | **n=4482** |
| 0 | 28.8 | 20.1 |
| 1–4 | 39.2 | 36.6 |
| 5–8 | 16.6 | 21.2 |
| 9–12 | 10.0 | 13.5 |
| 13+ | 5.5 | 8.7 |
| **18 months** | **n=932** | **n=4041** |
| 0 | 22.1 | 13.8 |
| 1–6 | 45.1 | 41.0 |
| 7–12 | 17.7 | 22.2 |
| 13–18 | 9.8 | 14.2 |
| 19+ | 5.4 | 8.8 |
| **24 months** | **n=723** | **n=3646** |
| 0 | 17.8 | 10.4 |
| 1–8 | 50.8 | 43.0 |
| 9–16 | 17.3 | 23.0 |
| 17–24 | 9.0 | 14.5 |
| 25+ | 5.1 | 9.2 |

ICS, inhaled corticosteroid; LABA, long-acting β2-agonist; UMEC, umeclidinium; VI, vilanterol.
